# Supplementary material
Source: PubMed Central journal article supplement (PMC2650400)
Supplement: NIHMS95776-supplement-01.pdf [file NIHMS95776-supplement-01.pdf]

## Supplemental Methods

### Generation of transgenes

*ptub-FRT-Gal80-FRT* (*ptub>Gal80>*) was generated by amplifying the *Gal80* open reading frame by PCR using genomic DNA of *yw*, *FRT19A*, *tub-Gal80* as a template (Lee and Luo, 1999). Primers were designed to add the FRT site GAAGTTCCTATTCTCTAGAAAGTATAGGAACTTC to each end of the fragment and introduce a flanking NotI site. The amplified fragment was cloned into the NotI site of *ptub* (Lee and Luo, 1999). Full primer sequences:

Forward:

ACAGCGGCCGCGAAGTTCCTATTCTCTAGAAAGTATAGGAACTTCGCAACAT  
GGACTACAACAAGAGATC

Reverse:

ACAGCGGCCGCGAAGTTCCTATACTTTCTAGAGAATAGGAACTTCGCCTTCTA  
GTGGATCCAGACAT

*UAS-CD4::spGFP1-10* and *LexAop-CD4::spGFP11* were generated by PCR amplification of *CD4::spGFP1-10* and *CD4::spGFP11* (Feinberg et al., 2008) with XhoI (5') and XbaI (3') sites added to primers. The PCR fragments were then cloned into *pUAST* and *pLOT* respectively. Primer sequences:

Forward: CCCTCGAGATGCCACCTTCAACATCATTG

Reverse: GCTCTAGACTAGCGCCTTCGGTGCCG

*Gr5a-LexA:VP16* was generated by PCR amplification of the *Gr5a* promoter from genomic DNA, using primers with flanking Sall (5') and XhoI (3') sites. The PCR product was cut with Sall and XhoI and cloned into *pCasper4* cut with XhoI.

*LexA::VP16* was then excised from *Or83b-LexA::VP16* (Lai and Lee, 2006) using XhoI and cloned into *pCasper4-Gr5a* cut with XhoI. Primer sequences:

Forward: GATCTCGTCGACGATTCCTTCTGCGCTCAAAA

Reverse: GAACGTCTCGAGAAATCCTGACTAAACGGCAAA

### Inducible activation with VR1

For heat activation of VR1, flies expressing VR1 were starved for 16h and mounted on myristic acid as described above. Extension assays were performed by bringing a probe heated to approximately 150°C within 5mm of fly for 1s.

**Table S1: Expression summary for Gal4 behavioral mutants.**

| Line | Mutant class | Taste sensory neuron expression | non-sensory SOG neuron expression | non-SOG neuron expression |
|------|--------------|---------------------------------|-----------------------------------|---------------------------|
| E402 | bitter       | +                               | +                                 | +                         |
| E441 | bitter       | +                               | +                                 | +                         |
| E657 | bitter       | +                               | +                                 | +                         |
| E628 | bitter       | +                               | -                                 | +                         |
| E806 | bitter       | +                               | -                                 | +                         |
| E809 | bitter       | +                               | -                                 | +                         |
| E133 | bitter       | +                               | -                                 | -                         |
| E419 | bitter       | +                               | -                                 | -                         |
| E23  | bitter       | -                               | +                                 | +                         |
| E34  | bitter       | -                               | +                                 | +                         |
| E175 | bitter       | -                               | +                                 | +                         |
| E320 | bitter       | -                               | +                                 | +                         |
| E442 | bitter       | -                               | +                                 | +                         |
| E496 | bitter       | -                               | +                                 | +                         |
| E515 | bitter       | -                               | +                                 | +                         |
| E708 | bitter       | -                               | +                                 | +                         |
| E734 | bitter       | -                               | +                                 | +                         |
| E86  | bitter       | -                               | -                                 | +                         |
| E150 | bitter       | -                               | -                                 | +                         |
| E157 | bitter       | -                               | -                                 | +                         |

|      |              |   |   |   |
|------|--------------|---|---|---|
| E184 | bitter       | - | - | + |
| E234 | bitter       | - | - | + |
| E239 | bitter       | - | - | + |
| E401 | bitter       | - | - | + |
| E593 | bitter       | - | - | + |
| E596 | bitter       | - | - | + |
| E718 | bitter       | - | - | + |
| E350 | sugar        | + | + | + |
| E67  | sugar        | - | + | + |
| E131 | sugar        | - | + | + |
| E762 | sugar        | - | + | + |
| E548 | sugar        | - | - | + |
| E745 | sugar        | - | - | + |
| E143 | unresponsive | + | + | + |
| E243 | unresponsive | + | + | + |
| E404 | unresponsive | + | + | + |
| E440 | unresponsive | + | + | + |
| E463 | unresponsive | + | + | + |
| E535 | unresponsive | + | + | + |
| E651 | unresponsive | + | + | + |
| E760 | unresponsive | + | + | + |
| E49  | motor        | + | + | + |
| E51  | motor        | - | + | + |
| E85  | motor        | - | + | + |
| E470 | motor        | - | + | + |
| E639 | motor        | - | + | + |
| E662 | motor        | - | + | + |

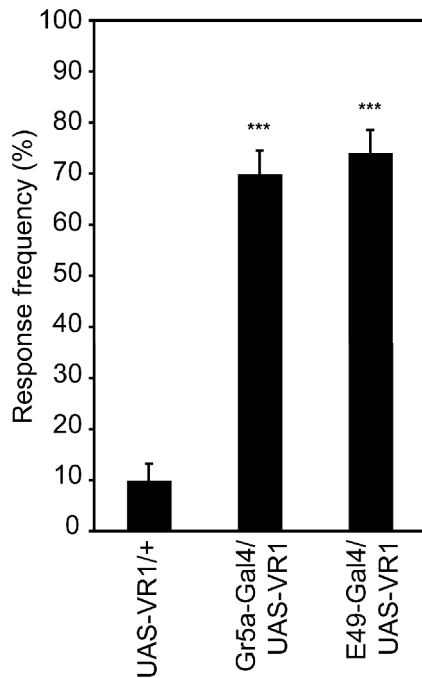

**Figure S1: Inducible activation with VR1 evokes rostrum extension.**

Flies expressing VR1 in Gr5a-expressing cells or E49 neurons show robust extension in response to heat delivered by a heated probe brought within a few millimeters of the fly. n= 56-76 flies. For quantitation, any extension of the rostrum or rostrum and haustellum is counted as a response; however, in general Gr5a-Gal4/UAS-VR1 flies displayed full extension, while E49-Gal4/UAS-VR1 flies displayed only lifting of the rostrum. Student t-test, \*\*\* =  $p < 10^{-5}$ .

**Supplemental Video 1:** This movie shows the Proboscis Extension Response (PER) of a wild-type fly following stimulation on the leg with 100mM sucrose (Quicktime; 4.8 MB).

**Supplemental Video 2:** This movie shows the response of *E49-Gal4, UAS-TNT* flies following stimulation on the leg with 100mM sucrose (Quicktime; 4.9 MB).

**Supplemental Video 3:** This movie shows the response of *Gr5a-Gal4, UAS-ChR2* flies to alternating pulses of red light (3s pulses; 690nm) and blue light (1s pulses; 480nm) (Quicktime; 8.9 MB).

**Supplemental Video 4:** This movie shows the response of *E49-Gal4, UAS-ChR2* flies to alternating pulses of red light (3s pulses; 690nm) and blue light (1s pulses; 480nm) (Quicktime; 9.9 MB).
